# Supplementary material for: Yield of community-based tuberculosis targeted testing and treatment in foreign-born populations in the United States: A systematic review
Source: PubMed Central journal article supplement (PMC5546677; doi:10.1371/journal.pone.0180707), 2017-08-07
Supplement: pone.0180707.s006.pdf [file pone.0180707.s006.pdf]

**Proportion and 95% confidence interval for TB testing and treatment cascade: community-based programs among foreign-born populations in the US.**

a. Predominantly (>90%) foreign-born populations

|                          | Recruited                   | Test Placed                 | Valid Results               | Test (+)                    | Received CXR*               | Offered Treatment           | Started Treatment           | Completed Treatment         |
|--------------------------|-----------------------------|-----------------------------|-----------------------------|-----------------------------|-----------------------------|-----------------------------|-----------------------------|-----------------------------|
| <b>Reached</b>           | <b>0.51</b><br>(0.42, 0.59) | <b>0.49</b><br>(0.40, 0.58) | <b>0.43</b><br>(0.34, 0.51) | <b>0.12</b><br>(0.09, 0.15) | <b>0.13</b><br>(0.11, 0.14) | <b>0.04</b><br>(0.03, 0.06) | <b>0.11</b><br>(0.10, 0.12) | <b>0.03</b><br>(0.00, 0.09) |
| <b>Recruited</b>         |                             | <b>0.91</b><br>(0.70, 1.00) | <b>0.71</b><br>(0.58, 0.83) | <b>0.21</b><br>(0.13, 0.30) | <b>0.00</b><br>(0.00, 0.05) | <b>0.08</b><br>(0.05, 0.11) | <b>0.00</b><br>(0.00, 0.05) | <b>0.05</b><br>(0.03, 0.08) |
| <b>Test Placed</b>       |                             |                             | <b>0.87</b><br>(0.76, 0.95) | <b>0.29</b><br>(0.25, 0.34) | <b>0.19</b><br>(0.11, 0.29) | <b>0.08</b><br>(0.03, 0.16) | <b>0.12</b><br>(0.05, 0.22) | <b>0.08</b><br>(0.02, 0.16) |
| <b>Valid Results</b>     |                             |                             |                             | <b>0.39</b><br>(0.29, 0.50) | <b>0.24</b><br>(0.14, 0.35) | <b>0.10</b><br>(0.03, 0.20) | <b>0.15</b><br>(0.07, 0.25) | <b>0.09</b><br>(0.03, 0.17) |
| <b>Test (+)</b>          |                             |                             |                             |                             | <b>0.66</b><br>(0.35, 0.91) | <b>0.35</b><br>(0.06, 0.70) | <b>0.40</b><br>(0.14, 0.70) | <b>0.28</b><br>(0.08, 0.54) |
| <b>Received CXR</b>      |                             |                             |                             |                             |                             | <b>0.50</b><br>(0.38, 0.62) | <b>0.66</b><br>(0.44, 0.85) | <b>0.43</b><br>(0.19, 0.69) |
| <b>Offered treatment</b> |                             |                             |                             |                             |                             |                             | <b>1.00</b><br>(0.92, 1.00) | <b>0.60</b><br>(0.45, 0.75) |
| <b>Started treatment</b> |                             |                             |                             |                             |                             |                             |                             | <b>0.69</b><br>(0.53, 0.83) |
| <b>LEGEND</b>            | <b>0-1 Study</b>            |                             | <b>2 Studies</b>            |                             | <b>3-4 Studies</b>          |                             | <b>&gt; 4 Studies</b>       |                             |

Used random-effects meta-analysis modeling to pooled proportions if > 1 studies

\*CXR = chest X-ray

b. Majority (50-90%) foreign-born populations

|                   | Recruited             | Test Placed           | Valid Result          | Test (+)              | Received CXR*         | Offered Treatment     | Started Treatment     | Finished Treatment    |
|-------------------|-----------------------|-----------------------|-----------------------|-----------------------|-----------------------|-----------------------|-----------------------|-----------------------|
| Reached           | 0.85<br>(0.59 - 0.99) | 0.85<br>(0.59 - 0.99) | 0.66<br>(0.44 - 0.85) | 0.20<br>(0.12 - 0.30) | 0.10<br>(0.05 - 0.16) | 0.08<br>(0.03 - 0.16) | 0.02<br>(0.01 - 0.03) | 0.01<br>(0.00 - 0.01) |
| Recruited         |                       | 1.00<br>(1.00 - 1.00) | 0.94<br>(0.83 - 0.99) | 0.30<br>(0.26 - 0.33) | 0.25<br>(0.21 - 0.30) | 0.15<br>(0.13 - 0.18) | No<br>Data            | 0.01<br>(0.00 - 0.02) |
| Test Placed       |                       |                       | 0.92<br>(0.84 - 0.97) | 0.30<br>(0.28 - 0.32) | 0.27<br>(0.25 - 0.28) | 0.17<br>(0.14 - 0.20) | No<br>Data            | 0.01<br>(0.00 - 0.02) |
| Valid Result      |                       |                       |                       | 0.34<br>(0.29 - 0.39) | 0.23<br>(0.15 - 0.32) | 0.16<br>(0.10 - 0.22) | 0.12<br>(0.00 - 0.35) | 0.02<br>(0.01 - 0.03) |
| Test (+)          |                       |                       |                       |                       | 0.80<br>(0.53 - 0.97) | 0.56<br>(0.46 - 0.66) | 0.35<br>(0.03 - 0.79) | 0.06<br>(0.03 - 0.11) |
| Received CXR      |                       |                       |                       |                       |                       | 0.66<br>(0.53 - 0.77) | 0.31<br>(0.22 - 0.42) | 0.07<br>(0.03 - 0.12) |
| Offered Treatment |                       |                       |                       |                       |                       |                       | 0.43<br>(0.26 - 0.63) | 0.12<br>(0.05 - 0.21) |
| Started Treatment |                       |                       |                       |                       |                       |                       |                       | 0.90<br>(0.60 - 0.98) |
| LEGEND            | 0-1 Study             |                       | 2 Studies             |                       | 3-4 Studies           |                       | > 4 Studies           |                       |

Used random-effects meta-analysis modeling to pooled proportions if > 1 studies

\*CXR = chest X-ray
