# Supplementary material for: Yield of community-based tuberculosis targeted testing and treatment in foreign-born populations in the United States: A systematic review
Source: PubMed Central journal article supplement (PMC5546677; doi:10.1371/journal.pone.0180707), 2017-08-07
Supplement: pone.0180707.s007.pdf [file pone.0180707.s007.pdf]

**Appendix S7: Proportion and 95% confidence interval for subset of steps in TB testing and treatment cascade: community-based programs among foreign-born populations in the US by target population and percent foreign-born**

**1 - Predominantly foreign-born population**

| Cascade steps           | # Studies | N   | Proportion | 95% CI      | Studies                 | N    | Proportion | 95% CI      |
|-------------------------|-----------|-----|------------|-------------|-------------------------|------|------------|-------------|
| Migrant Farmworkers     |           |     |            |             | Other Target Population |      |            |             |
| Recruited / Reached     | 2         | 725 | 0.46       | 0.43 - 0.50 | 1                       | 584  | 0.51       | 0.47 - 0.55 |
| Test placed / Recruited | 2         | 335 | 0.98       | 0.96 - 0.99 | 1                       | 298  | 0.89       | 0.85 - 0.92 |
| Test read / Test placed | 3         | 465 | 0.92       | 0.58 - 1.00 | 5                       | 2377 | 0.84       | 0.71 - 0.94 |
| Test (+) / Test read    | 5         | 938 | 0.34       | 0.21 - 0.48 | 6                       | 2940 | 0.43       | 0.28 - 0.59 |
| CXR / Test (+)          | 1         | 15  | 0.00       | 0.00 - 0.20 | 3                       | 672  | 0.79       | 0.46 - 0.99 |
| Offered tx / CXR        | 2         | 101 | 0.72*      | 0.63 - 0.81 | 1                       | 31   | 0.29       | 0.16 - 0.47 |
| Offered tx / Test (+)   | 1         | 15  | 0.00       | 0.00 - 0.20 | 3                       | 142  | 0.62       | 0.18 - 0.97 |
| Start tx / Offered tx   | 1         | 30  | 0.3*       | 0.17 - 0.48 | 2                       | 50   | 0.71       | 0.57 - 0.83 |
| Finished tx / Start tx  | 1         | 9   | 0.89*      | 0.57 - 0.98 | 3                       | 477  | 0.69       | 0.53 - 0.83 |

**2 – Majority foreign-born population**

| Cascade steps           | # Studies | N    | Proportion | 95% CI    | Studies                  | N    | Proportion | 95% CI    |
|-------------------------|-----------|------|------------|-----------|--------------------------|------|------------|-----------|
| Migrant Farmworkers     |           |      |            |           | Other Target Populations |      |            |           |
| Recruited / Reached     | 3         | 1936 | 0.85       | 0.59-0.99 | 0                        | 0    | -          | -         |
| Test placed / Recruited | 3         | 1598 | 1.00       | 1.00-1.00 | 0                        | 0    | -          | -         |
| Test read / Test placed | 3         | 1598 | 0.92       | 0.84-0.97 | 1                        | 2193 | 0.85       | 0.84-0.87 |
| Test (+) / Test read    | 7         | 3632 | 0.34       | 0.28-0.41 | 1                        | 1871 | 0.34       | 0.32-0.36 |
| CXR / Test (+)          | 3         | 257  | 0.74       | 0.35-0.99 | 1                        | 639  | 0.92       | 0.90-0.94 |
| Offered tx / CXR        | 2         | 121  | 0.59       | 0.50-0.67 | 1                        | 590  | 0.72       | 0.53-0.77 |
| Offered tx / Test (+)   | 3         | 274  | 0.52       | 0.46-0.58 | 1                        | 639  | 0.67       | 0.63-0.70 |
| Start tx / Offered tx   | 1         | 23   | 0.43       | 0.26-0.63 | 0                        | 0    | -          | -         |
| Finished tx / Start tx  | 1         | 10   | 0.90       | 0.60-0.98 | 0                        | 0    | -          | -         |

Tx = Treatment

X / Y = means proportion of “X” of those who proceeded to stage “Y”. For example, Recruited / Reached: proportion of recruited of those who were reached)
